# Supplementary material for: Cross-Cultural Adaptation and Validation of the Persian Version of American Dental Education Association (ADEA) tool on action on professionalism in dental education
Source: Research Square preprint supplement (doi:10.21203/rs.3.rs-7056153/v1), 2025-08-08
Supplement: Supplementary file 1 [file 0c79210192c5d95db5780c7f.docx]

**Questionnaire on Action on Professionalism in Dental Education Dear Student**

Dear student:

This questionnaire is designed to help you self-assess your professional commitment to dental education. Please read it carefully and take the time to answer all the questions. It is important to note that, in order to maintain confidentiality, this questionnaire does not require your name or surname, and all your information and responses will remain confidential. Additionally, by completing this questionnaire, you consent to participate in this study; however, you may choose to refrain from answering any questions at any time if you wish to withdraw from the study. Thank you for your cooperation and time.

Age: ……….. years old

Sex: Male Female

Year of Education: …………..

|  |  |  |  |  | Always | Often | Sometimes | seldom | Never |
| --- | --- | --- | --- | --- | --- | --- | --- | --- | --- |
| - **Questions for self-evaluation of competency** | | | | | | | | | |
| Learning about oral health care is my top priority. | | | | |  |  |  |  |  |
| I am cultivating the habits and practices of lifelong learning, which include self-evaluationskills. | | | | |  |  |  |  |  |
| I accept and respond positively to constructive criticism regarding my performance. | | | | |  |  |  |  |  |
| I am learning and practicing effective communication skills. | | | | |  |  |  |  |  |
| I am aware of the limits of my knowledge and skills, and I practice within those boundaries. | | | | |  |  |  |  |  |
| I understand when and how to refer a patient. | | | | |  |  |  |  |  |
| I am committed to lifelong learning. | | | | |  |  |  |  |  |
| I recognize the importance of collaboration and take action to foster it. | | | | |  |  |  |  |  |
| - **Questions for Self-evaluation of Fairness** | | | | | | | | | |
| I adhere to institutional rules and regulations. | | | | |  |  |  |  |  |
| I analyze situations from various perspectives, particularly those that necessitate evaluation. | | | | |  |  |  |  |  |
| I advocate for equal access to oral health care. | | | | |  |  |  |  |  |
| - **Questions for Self-evaluation of Integrity** | | | | | | | | | |
| I strive for both personal and professional excellence. | | | | |  |  |  |  |  |
| I take examinations with integrity. | | | | |  |  |  |  |  |
|  | | | | | Always | Often | Sometimes | seldom | Never |
| I accurately document entries in patients' records. | | | | |  |  |  |  |  |
| I represent my knowledge with integrity. | | | | |  |  |  |  |  |
| - **Questions for Self-evaluation of Responsibility:** | | | | | | | | | |
| I fulfill my commitments, complete assignments punctually, and prioritize learning above all else. | | | | |  |  |  |  |  |
| I acknowledge and correct errors. | | | | |  |  |  |  |  |
| I respect the time commitments of others. | | | | |  |  |  |  |  |
| I ensure that all patient care provided is in the best interest of the patients. | | | | |  |  |  |  |  |
| I ensure that the patient care provided is both appropriate and comprehensive | | | | |  |  |  |  |  |
| - **Questions for Self-evaluation of Respect:** | | | | | | | | | |
| I am cultivating a nuanced understanding of patients' rights and values. | | | | |  |  |  |  |  |
| I accept and embrace cultural diversity. | | | | |  |  |  |  |  |
| I am developing my cross-cultural communication skills. | | | | |  |  |  |  |  |
| I accept and embrace diversity. | | | | |  |  |  |  |  |
| I demonstrate effective cross-cultural communication skills. | | | | |  |  |  |  |  |
| - **Questions for self-evaluation of service-mindedness** | | | | | | | | | |
| I contribute to and support the learning needs of peers. | | | | |  |  |  |  |  |
| I provide compassionate care. | | | | |  |  |  |  |  |
| I support the values of the profession. | | | | |  |  |  |  |  |
| I volunteer to work for the benefit of patients, society, colleagues, and the profession | | | | |  |  |  |  |  |
| I model a sincere concern for students, patients, peers, and humanity. | | | | |  |  |  |  |  |
| I identify and seize opportunities to deliver oral health care to underserved populations. | | | | |  |  |  |  |  |
